# Supplementary material for: Metabolic adaptation in the human gut microbiota during pregnancy and the first year of life
Source: PubMed Central journal article supplement — eBioMedicine. 2018 Nov 8;39:497–509. doi: 10.1016/j.ebiom.2018.10.071 (PMC6354444; doi:10.1016/j.ebiom.2018.10.071), 2018-11-08

**Fig. S1.** ANOSIM analyses for metagenome and metatranscriptome at protein family level among (A) all samples (metagenome:  $R = 0.624$ ,  $P = 0.001$ ; metatranscriptome:  $R = 0.688$ ,  $P = 0.001$ ), and (B) samples for vaginally delivered infants only (metagenome:  $R = 0.647$ ,  $P = 0.001$ ; metatranscriptome:  $R = 0.656$ ,  $P = 0.001$ ). The length of the bows indicates the level of heterogeneity and the width the number of compared samples. The “Between” comparisons represent comparisons across all timepoints.

(A) all samples

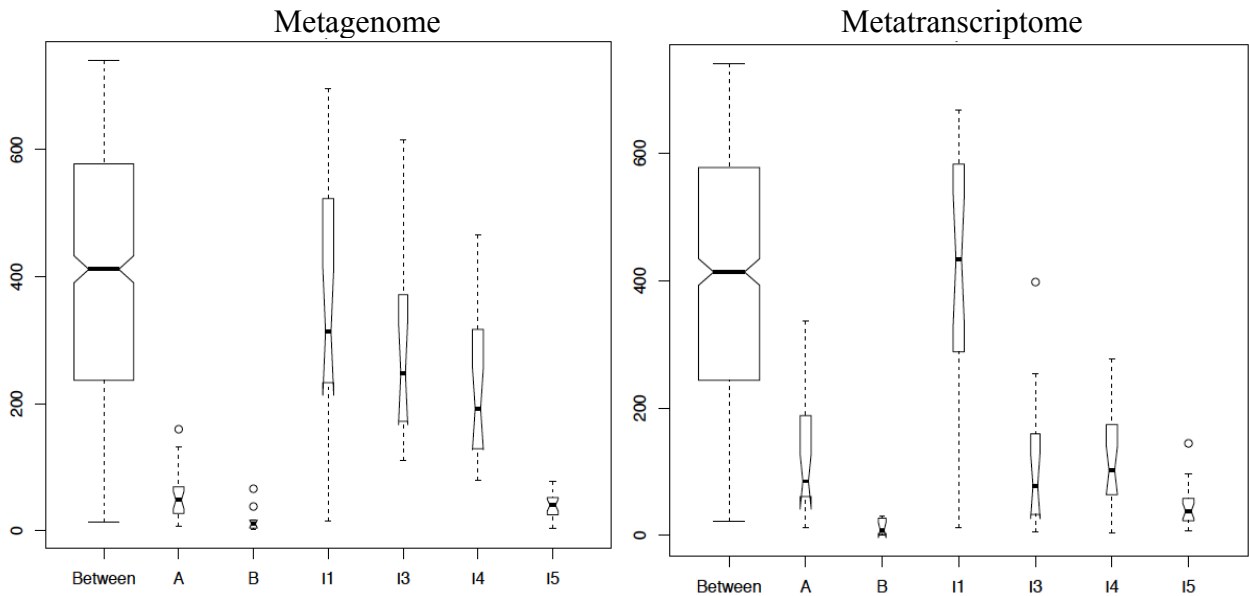

(B) vaginally delivered infants

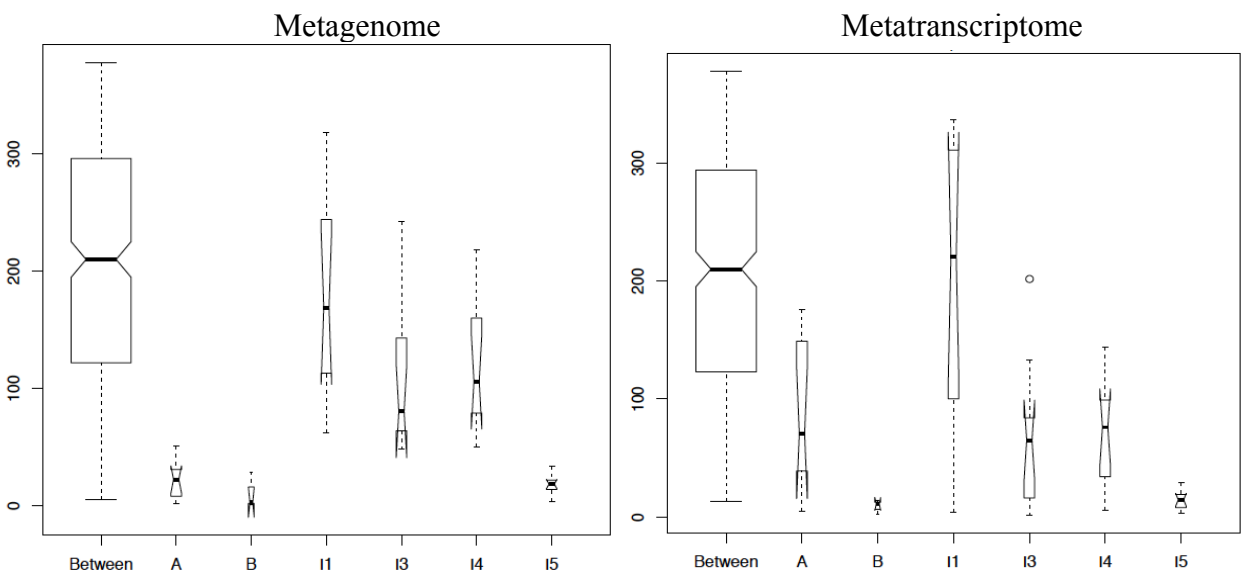

Supplement: mmc1.pdf [file mmc1.pdf]
